# Supplementary material for: Unlocking the Sustainable Workplace Equality Policy (SWEP): Evidence From an Emerging Country
Source: Preprints.org preprint supplement (doi:10.20944/preprints202312.0209.v1), 2023-12-04
Supplement: Supplementary file 1 [file supplementary]

**Unlocking the Sustainable Workplace Equality Policy (SWEP): Evidence From an Emerging Country**

## Author information:

1. **Dr Mohammed Hossain**

Department of Accounting and MIS

Gulf University for Science and Technology, Kuwait

Email: [hossainM@gust.edu.kw](mailto:hossainM@gust.edu.kw)

<https://orcid.org/0000-0003-0009-3094>

1. **Dr Yasean A Tahat1**

Department of Accounting and MIS

Gulf University for Science and Technology, Kuwait

Email: [Tahat.Y@gust.edu.kw](mailto:Tahat.Y@gust.edu.kw)

# Dr Naser AbuGhazaleh

Department of Accounting and MIS

Gulf University for Science and Technology, Kuwait

### Email: [abughazaleh.n@gust.edu.kw](mailto:abughazaleh.n@gust.edu.kw)

### Corresponding author:

Correspondence to Dr Yasean A Tahat.

### Contributions

All authors contributed to the study conception and design. Material preparation and data collection were performed by TA, data analysis was performed by all authors. The first draft of the manuscript was written byMohammed Hossain and all authors commented on previous versions of the manuscript. All authors read and approved the final manuscript.

## Funding:

The authors acknowledges GUST for granting this research project under “Seed grant (253737).

## Ethics declarations

### Conflict of interest

The authors have no relevant financial or non-financial interests to disclose.
